# Supplementary material
Source: MDPI journal article supplement (https://www.mdpi.com/2072-4292/11/19/2316)
Supplement: s1 [file s1]

Supplementary Materials:

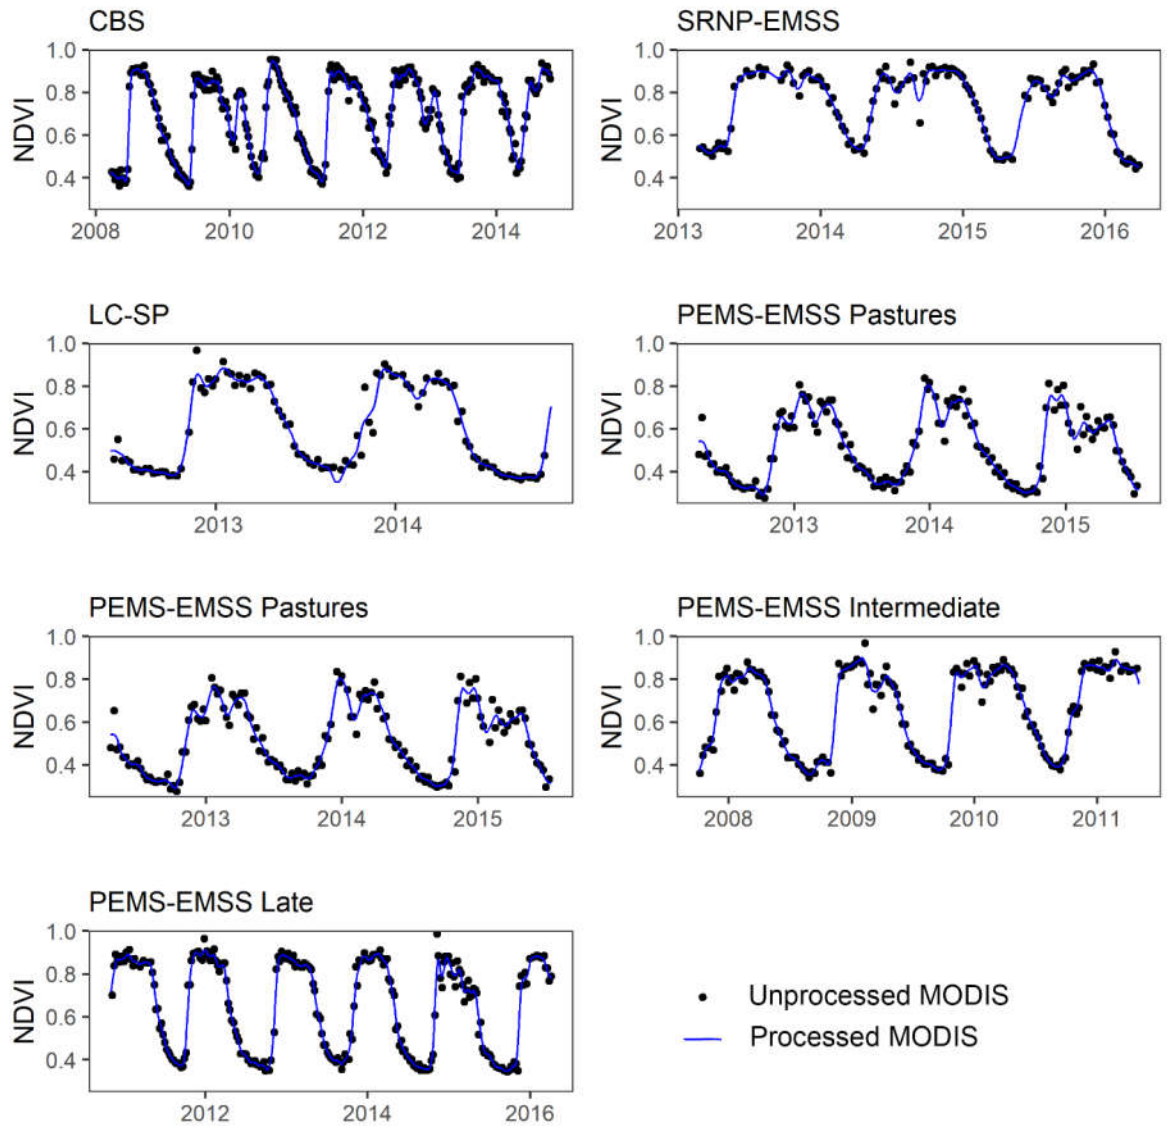

**Figure S1.** Unprocessed and processed time series of Normalized Difference Vegetation Index (NDVI) derived from MODIS (Moderate Resolution Imaging Spectroradiometer; Aqua & Terra) at four tropical dry forests distributed along the Americas. Chamela Biological Station (CBS), Santa Rosa National Park Environmental Monitoring Super Site (SRNP-EMSS), Lagoa do Cajueiro State Park (LC-SP), and Parque Estadual da Mata Seca Environmental Monitoring Super Site (PEMS-EMSS). Observations at the PEMS-EMSS come from four towers located in sites with different successional stages.

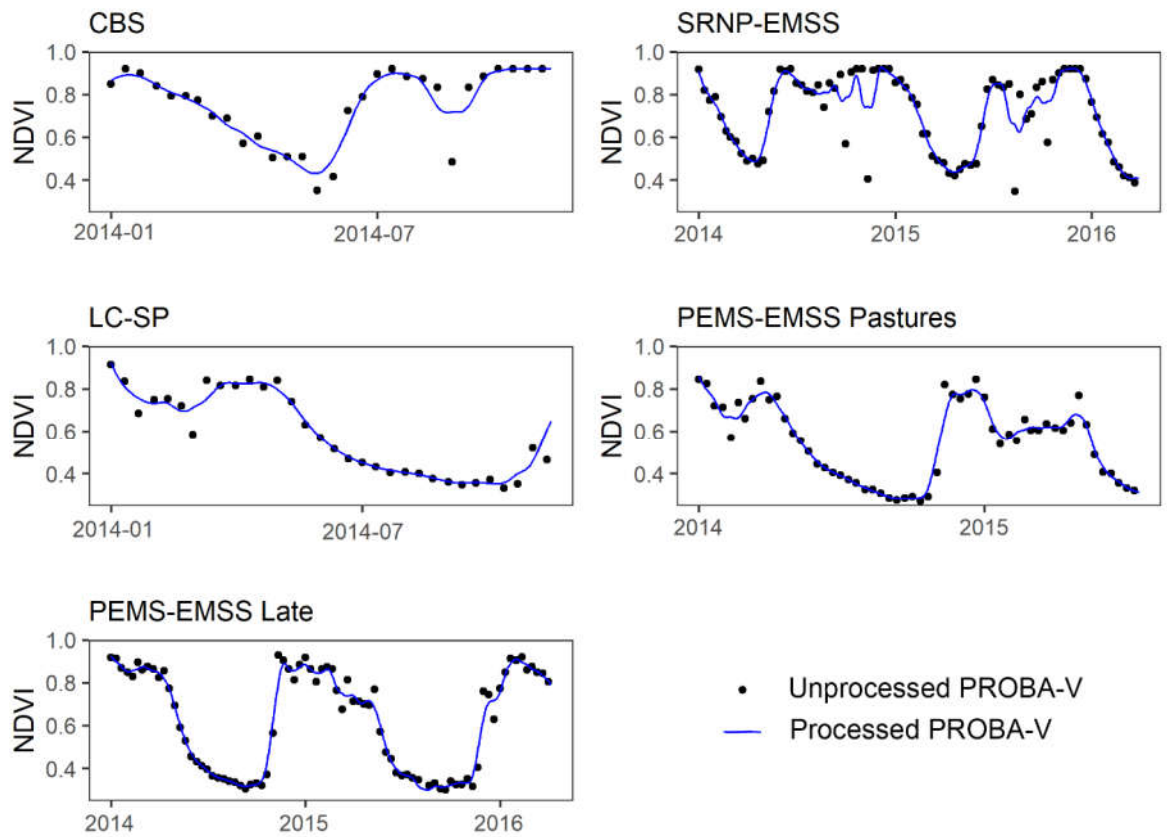

**Figure S2.** Unprocessed and processed time series of Normalized Difference Vegetation Index (NDVI) derived from PROBA-V (Project for On-Board Autonomy–Vegetation) at four tropical dry forests distributed along the Americas. Chamela Biological Station (CBS), Santa Rosa National Park Environmental Monitoring Super Site (SRNP-EMSS), Lagoa do Cajueiro State Park (LC-SP), and Parque Estadual da Mata Seca Environmental Monitoring Super Site (PEMS-EMSS). Observations at the PEMS-EMSS come from four towers located in sites with different successional stages.
